# Supplementary material
Source: PubMed Central journal article supplement (PMC4922694)
Supplement: JCI85265.sd.pdf [file JCI85265.sd.pdf]

## Supplemental material

**Supplemental Table 1**

|                                               | Native biopsy | Transplant biopsy |
|-----------------------------------------------|---------------|-------------------|
| IgG subclass presence                         | IgG1 and IgG4 | IgG1              |
| Complement positivity                         | C3 and C4d    | C4d               |
| Electron microscopy performed                 | Yes           | No                |
| MN stadium according to Ehrenreich and Churgh | 2             | -                 |
| Enhanced PLA <sub>2</sub> R1 staining         | No            | No                |
| Enhanced THSD7A staining                      | Yes           | Yes               |

Biopsy findings in the native kidney biopsy in 2004 and the transplant biopsy in 2014.

**Supplemental Figure 1**

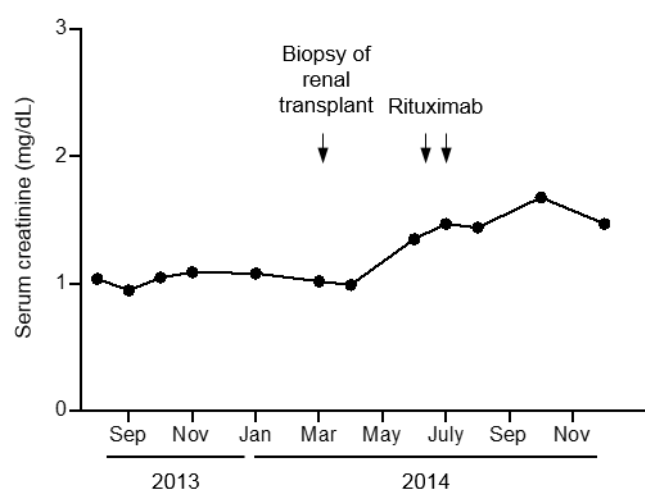

Serum creatinine levels in the patient after kidney transplantation due to MN-associated end-stage renal disease.

## Supplemental Figure 2

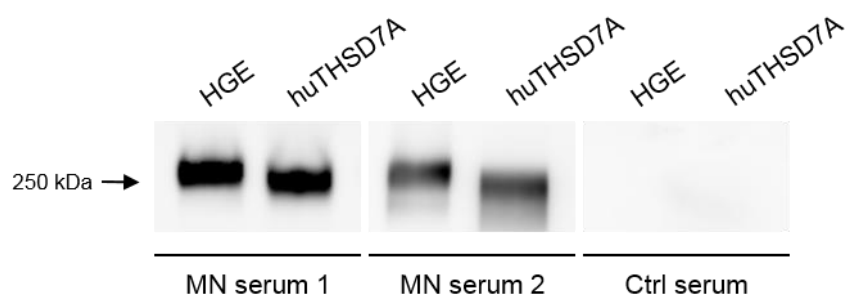

Results of Western blotting of human glomerular extracts (HGE) and recombinant human THSD7A (huTHSD7A) with sera from two different patients with anti-THSD7A antibody-positive MN and one healthy donor. Both sera recognize a 250 kDa protein present in HGE, corresponding to THSD7A, as well as recombinant huTHSD7A.

## Supplemental Table 2

|                                                             | MN 1   | MN 2  |
|-------------------------------------------------------------|--------|-------|
| <b>Patient characteristics</b>                              |        |       |
| Gender                                                      | F      | F     |
| Age                                                         | 30     | 29    |
| Proteinuria at serum withdrawal (g/g albumin-to-creatinine) | 3.4    | 7.1   |
| Anti-THSD7A titer according to IFT                          | 1:1000 | 1:320 |
| <b>Biopsy findings</b>                                      |        |       |
| Granular IgG staining                                       | Yes    | Yes   |
| C1q positivity                                              | Yes    | Yes   |
| C3 positivity                                               | Yes    | Yes   |
| Enhanced PLA <sub>2</sub> R1 staining                       | No     | No    |
| Enhanced THSD7A staining                                    | Yes    | Yes   |
| Electron microscopy performed                               | Yes    | Yes   |
| MN stadium according to Ehrenreich and Churgh               | 1      | 1     |

Clinical characteristics and biopsy findings of the patients whose sera were used for animal experiments.

### Supplemental Figure 3

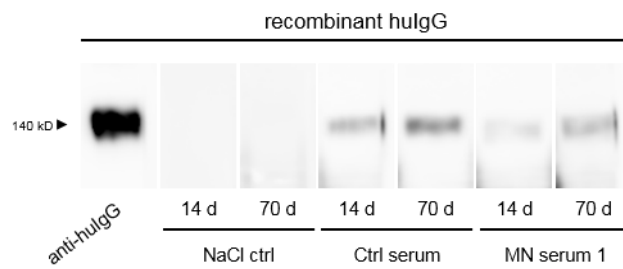

Immunoblots of recombinant hulG with specific anti-hulG antibody or serum from mice that were either injected with sodium chloride (NaCl ctrl) or serum from a healthy individual or from a patient with anti-THSD7A antibody-containing MN. d, days.

**Supplemental Figure 4A**

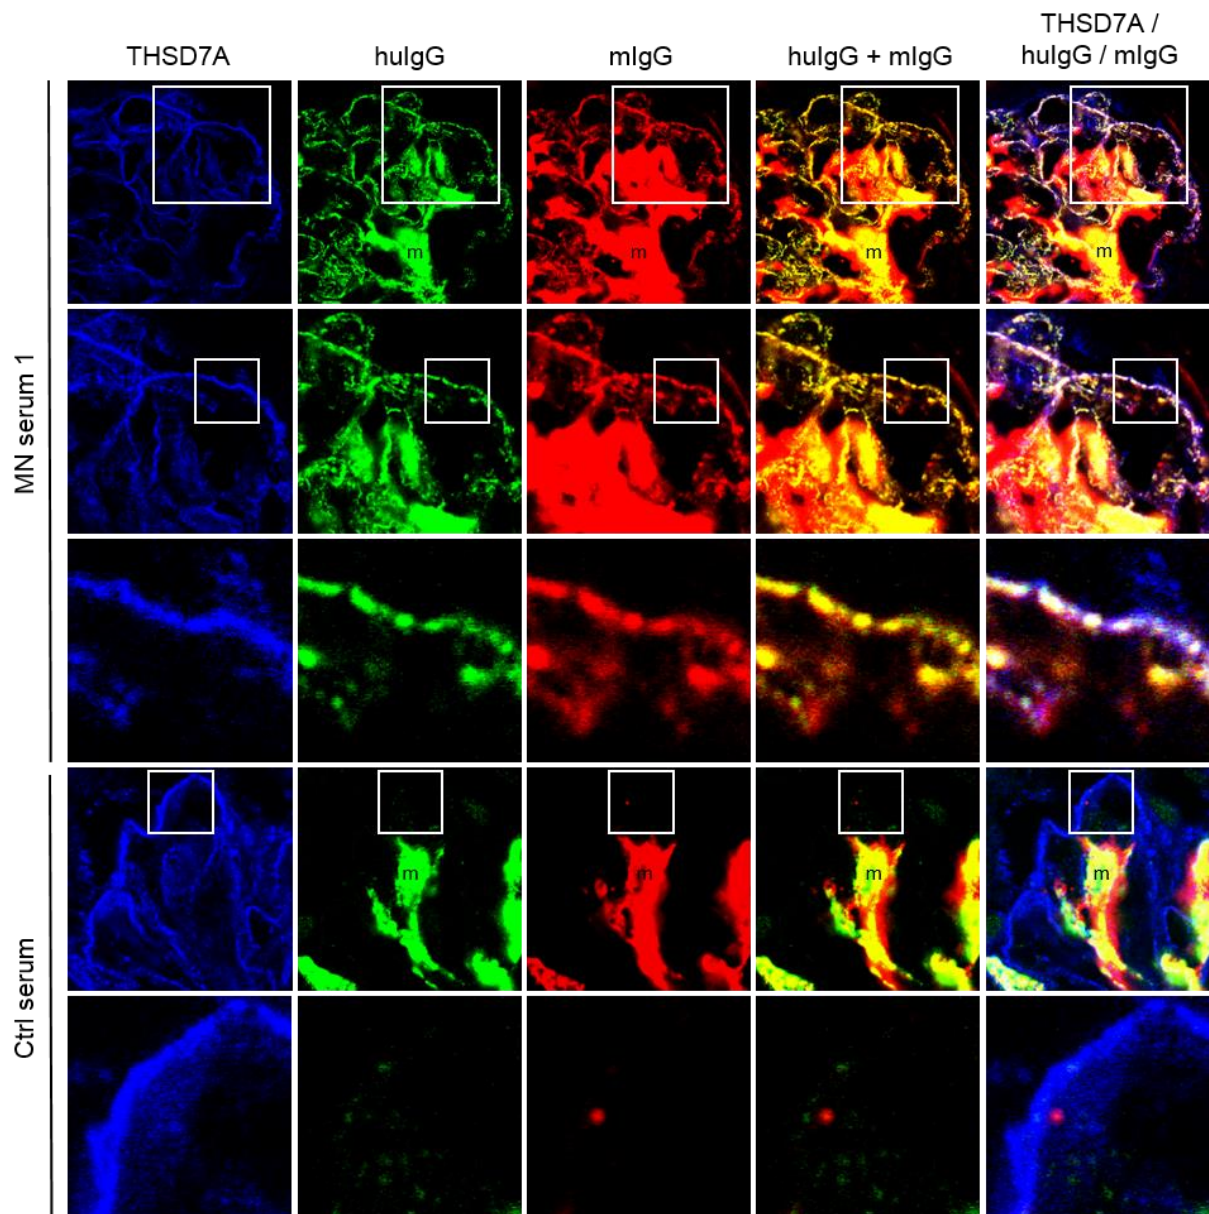

Immunofluorescent staining for THSD7A, human IgG (hulG), and mouse IgG (mlgG) in kidney samples from mice 70 days after intraperitoneal injection of either anti-THSD7A antibody-containing serum or control serum. HulG colocalizes with THSD7A and mlgG in the mouse that was injected with anti-THSD7A antibody-containing serum, suggesting the presence of immune complexes containing THSD7A, human anti-THSD7A antibodies and mouse anti-hulG. Only unspecific mesangial deposition (m) of hulG and mlgG is seen in the mouse that received serum from a healthy individual.

## Supplemental Figure 4B

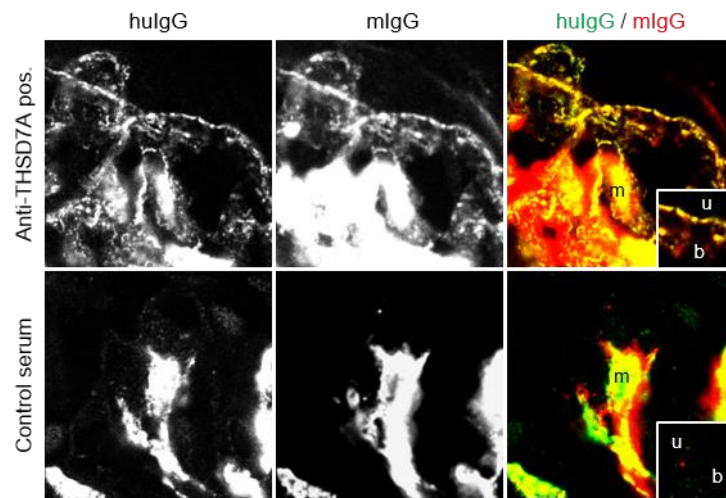

Greyscale images of immunofluorescent staining for human IgG (hulgG) and mouse IgG (mlgG) corresponding to the colored images from Supplemental Figure 4A.

### Supplemental Figure 5

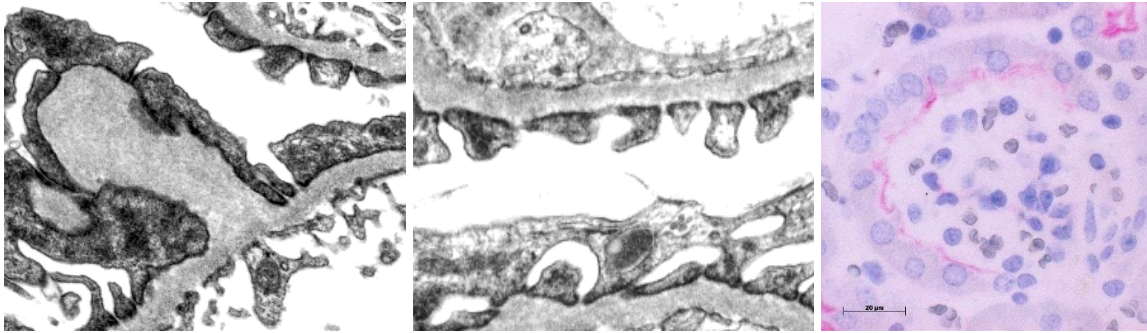

Electron microscopic studies of mouse glomeruli 70 days after injection of anti-THSD7A antibody-containing (left) or control serum (middle). Some subepithelial electron-dense deposits with areas of podocyte foot process effacement are seen on the left.

Immunohistochemical staining for human IgG (hulgG) in a mouse 70 days after receiving control serum does not depict deposition of hulgG (right).

## Supplemental Figure 6

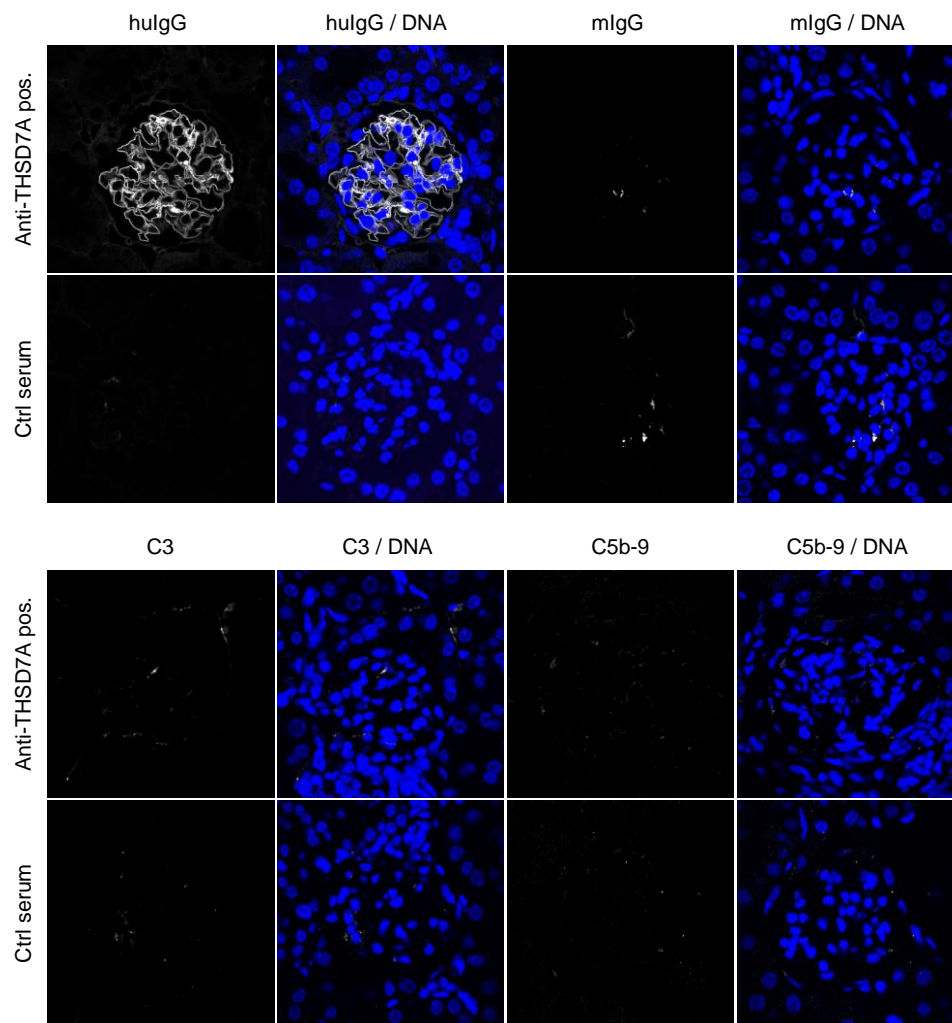

Immunofluorescent staining for DNA (blue) and human IgG (hulG), mouse IgG (mlgG), C3, and C5b-9 in mice three days after injection of either anti-THSD7A antibody-containing or control serum.

## Supplemental Figure 7

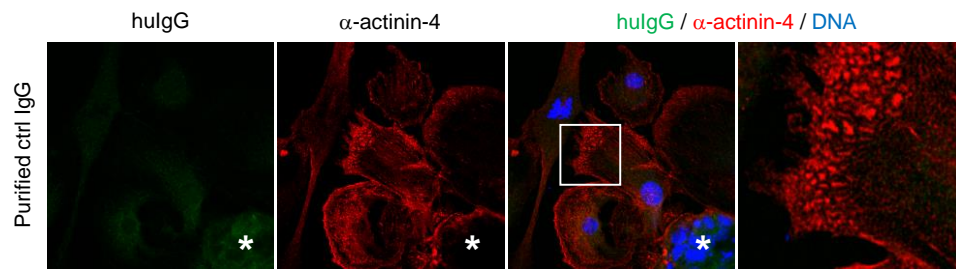

Immunofluorescent staining for human IgG (hulgG) and α-actinin-4 in mouse glomerular epithelial cells (GECs) following a 40-minute exposure to affinity-purified IgG from a healthy blood donor.

## Supplemental Figure 8

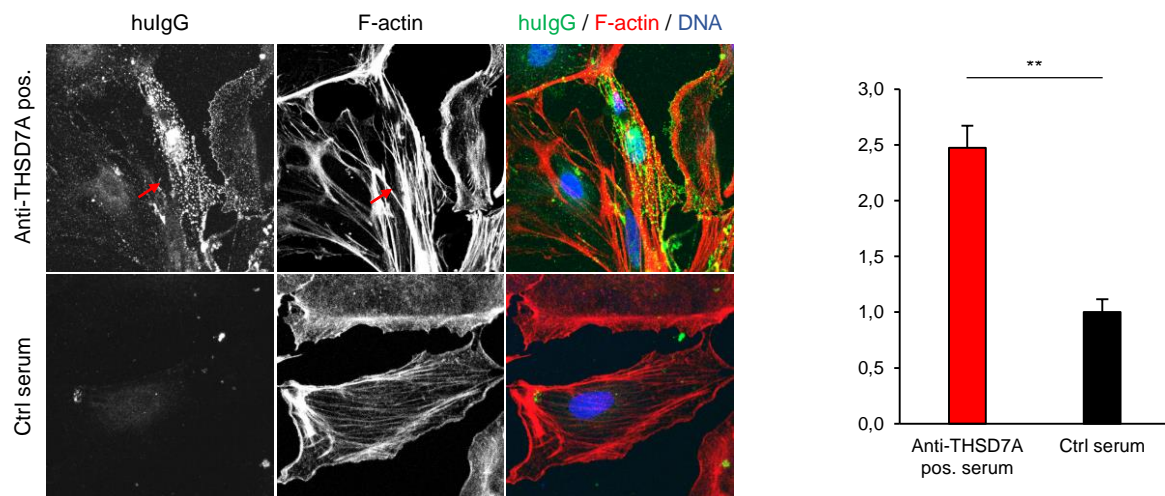

(A) Immunofluorescent staining for human IgG (hulgG) and filamentous (F)-actin (phalloidin) in mouse glomerular epithelial cells (GECs) following a 20-minute exposure to anti-THSD7A antibody-containing serum or control serum. (B) Quantification of stress fiber formation after treatment of GECs with anti-THSD7A antibody-containing serum or serum from a healthy individual. A total of thirty images from three independent experiments were analyzed. Data indicate F-actin optical density of individually circled cells normalized to the control condition (Ctrl serum). Error bars represent s.e.m. (\*\*  $P < 0.01$ ; two-tailed non-parametric Mann-Whitney  $U$  test).

## Supplemental Figure 9

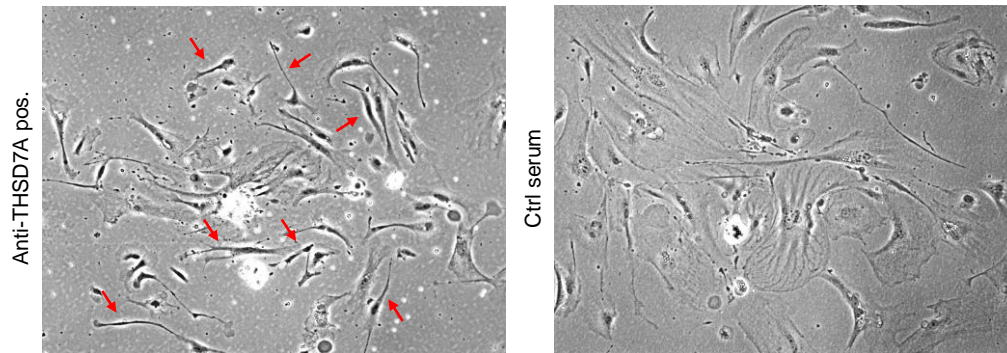

Representative phase-contrast micrographs of mouse glomerular epithelial cells (GECs) following a 40-minute exposure to 2% anti-THSD7A antibody-containing or control serum. Arrows depict elongated GECs with contracted cytoplasm, magnification 100-fold. Experiments were performed three independent times, each time with anti-THSD7A antibody-containing serum from two different patients.

**Supplemental Figure 10**

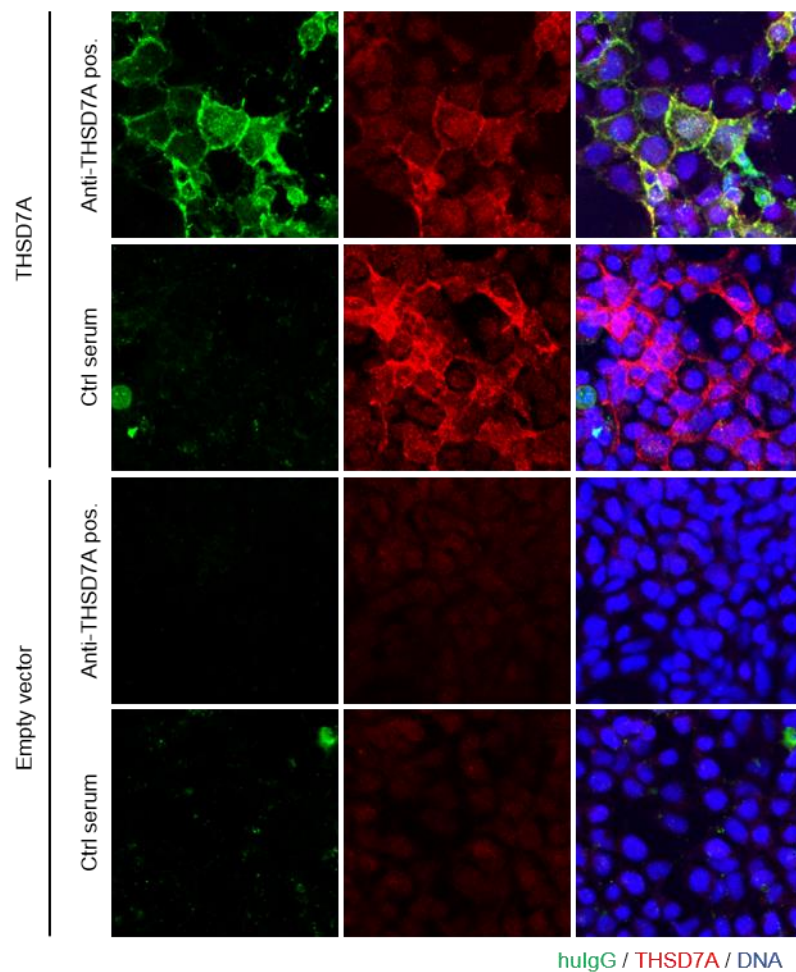

Immunofluorescent staining for hulgG and THSD7A in empty vector- or THSD7A-transfected HEK293 cells 30 minutes after treatment with either anti-THSD7A antibody-containing or control serum. Membrane-associated hulgG was exclusively found in THSD7A-transfected cells that were exposed to anti-THSD7A antibody-containing serum, suggesting specific binding of anti-THSD7A antibodies to transiently expressed THSD7A.

## Supplemental Figure 11

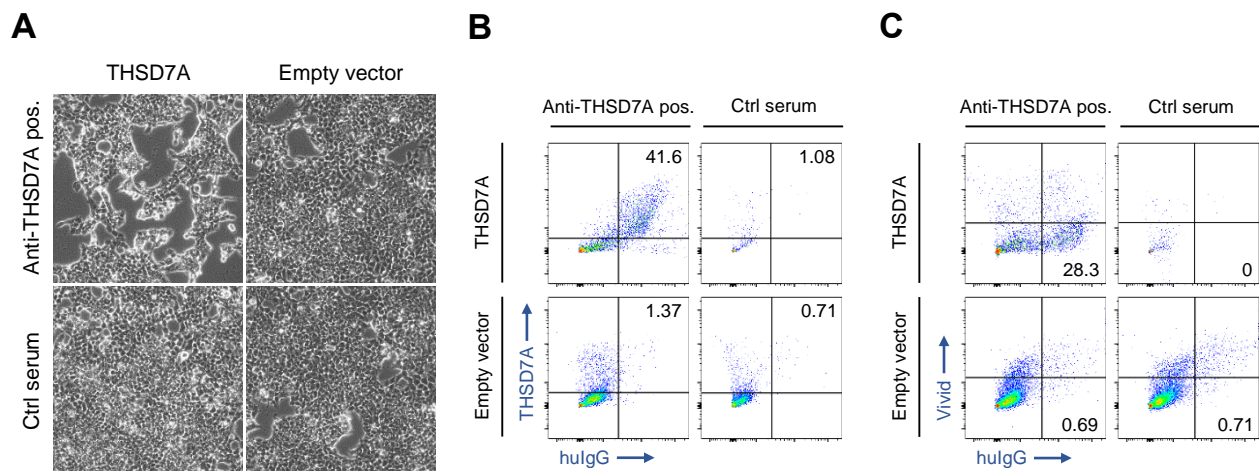

**(A)** Phase-contrast micrographs of HEK293 cells transiently transfected with an empty vector or with the same vector containing THSD7A cDNA 60 minutes after treatment with either anti-THSD7A antibody-containing or control serum, magnification 100-fold. **(B)** FACS analysis of THSD7A expression and human IgG (hulgG) binding in detached HEK293 cells following transient transfection with THSD7A or the empty vector and a 60-minute incubation with either anti-THSD7A antibody-containing or normal control serum. Representative plots from three independent experiments with one anti-THSD7A antibody-containing serum are shown. **(C)** FACS analysis of live/dead cells using Vivid stain and hulgG binding in detached HEK293 cells following transient transfection with THSD7A or the empty vector and a 60-minute incubation with either anti-THSD7A antibody-containing or normal control serum. Representative data from three independent experiments with one anti-THSD7A antibody-containing serum and one control serum are shown.

## Supplemental Figure 12

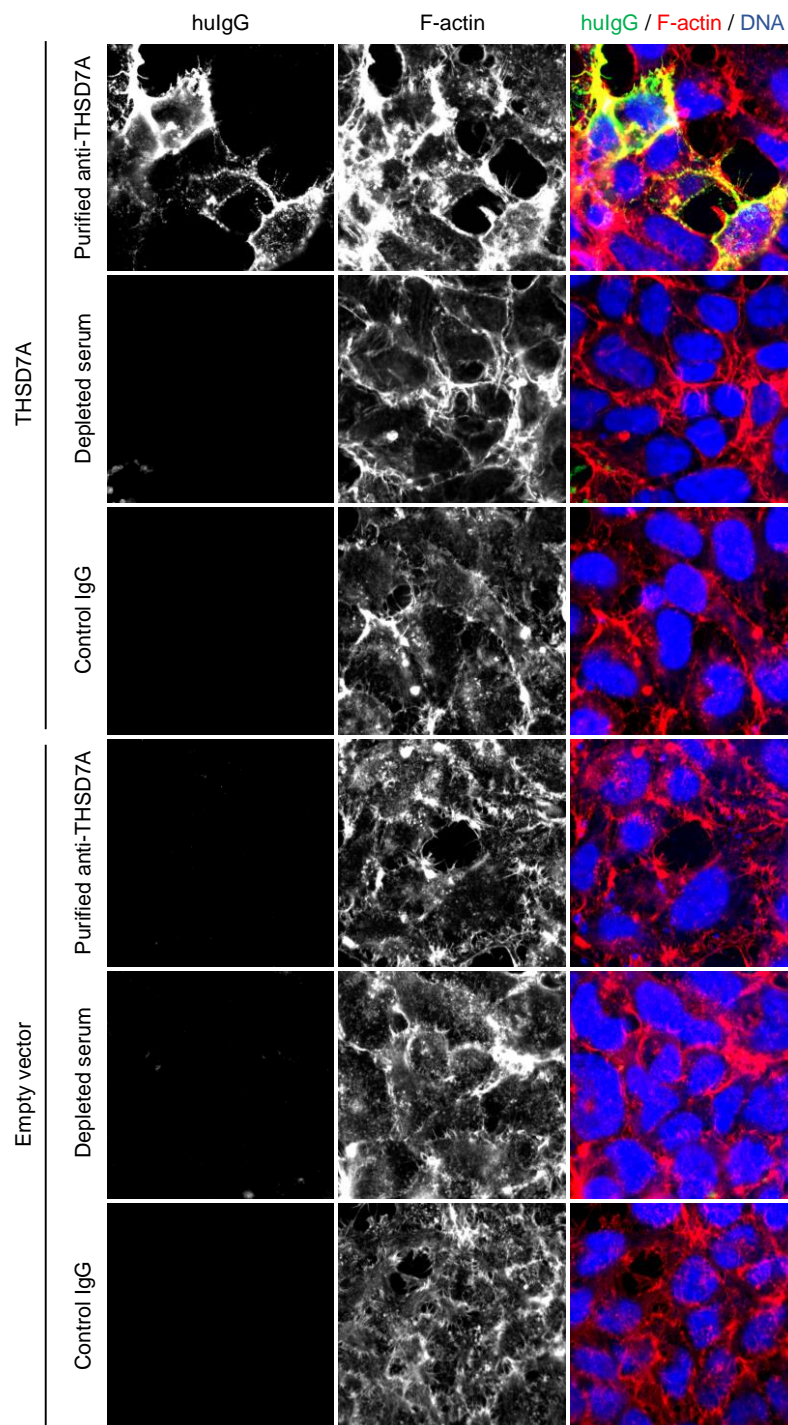

Immunofluorescent staining for human IgG (hulgG) and filamentous (F)-actin (phalloidin) in empty vector- and THSD7A-transfected HEK293 cells after a 30-minute exposure to affinity-purified anti-THSD7A antibodies, the serum depleted of anti-THSD7A antibodies, or IgG purified from a healthy donor.
